# Supplementary material for: A functional material that combines the Cr(vi) reduction activity of Burkholderia sp. with the adsorbent capacity of sol–gel materials
Source: Royal Society of Chemistry journal article supplement (doi:10.1039/c0jm04112b), 2011-01-01

**A functional material that combines the Cr (VI) reduction activity of *Burkholderia* sp. with the adsorbent capacity of sol-gel materials**

Gisela Solange Alvarez, María Lucía Foglia, Daniela Edhit Camporotondi, Maria

Victoria Tuttolomondo, Martín Federico Desimone\* and Luis Eduardo Díaz.

**Electronic Supplementary Information (ESI)**

Figure 1 SEM image of the surface of sol-gel silica materials.

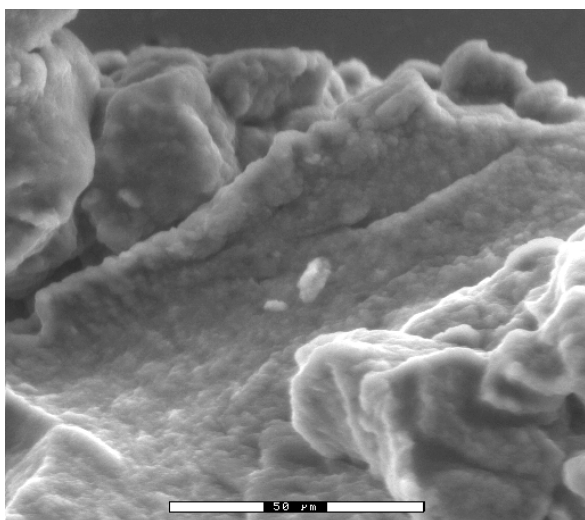

Figure 2 SEM image of *Burkholderia* sp. encapsulated in silica matrices.

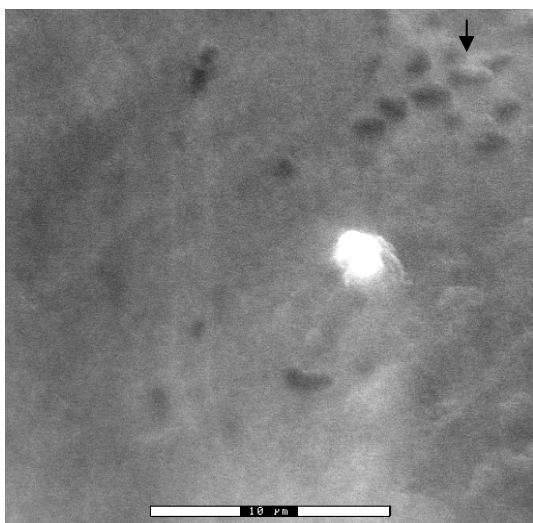

Supplement: c0jm04112b.pdf [file c0jm04112b.pdf]
